# Supplementary material
Source: PubMed Central journal article supplement (PMC4174956)
Supplement: 0c14fc88fe9544a454ae4eeb34090ce0_genetics.114.163006-4.pdf [file 0c14fc88fe9544a454ae4eeb34090ce0_genetics.114.163006-4.pdf]

**Table S2** The three largest overall expected junction densities  $\rho$  for  $2^n$ -way RIL on autosomes at the last generation  $g = U + V + 1$ .

| Scheme         | $n$ | $U$ | $(\rho, V)$ |             |             |
|----------------|-----|-----|-------------|-------------|-------------|
| Selfing        | 1   | 0   | (2.5, 2)    | (2.5, 3)    | (2.375, 4)  |
|                | 2   | 1   | (3.75, 2)   | (3.625, 3)  | (3.5, 1)    |
|                | 3   | 2   | (5, 1)      | (5, 2)      | (4.75, 3)   |
|                | 4   | 3   | (6.5, 1)    | (6.25, 2)   | (6, 0)      |
|                | 5   | 4   | (8, 0)      | (8, 1)      | (7.5, 2)    |
|                | 6   | 5   | (10, 0)     | (9.5, 1)    | (8.75, 2)   |
| Sibling mating | 1   | 0   | (4.875, 8)  | (4.863, 9)  | (4.844, 7)  |
|                | 2   | 0   | (7.301, 8)  | (7.297, 7)  | (7.256, 9)  |
|                | 3   | 1   | (8.512, 7)  | (8.484, 6)  | (8.475, 8)  |
|                | 4   | 2   | (9.75, 6)   | (9.727, 7)  | (9.688, 5)  |
|                | 5   | 3   | (11.016, 5) | (11.016, 6) | (10.941, 7) |
|                | 6   | 4   | (12.344, 5) | (12.312, 4) | (12.281, 6) |
