# Supplementary material
Source: PubMed Central journal article supplement (PMC4174956)
Supplement: 23b7adcdd6c2d30147d6f5c67706339a_genetics.114.163006-3.pdf [file 23b7adcdd6c2d30147d6f5c67706339a_genetics.114.163006-3.pdf]

# File S1

## Supplementary Materials

### S1 Expressions of the constant coefficients

The coefficients  $C_1$  and  $C_2$  in equation (14a) are determined by the initial conditions  $\alpha_0(12) = C_1 + C_2$  and  $\alpha_1(12) = \beta_0(12) = C_1\lambda_1 + C_2\lambda_2$ . Thus we have

$$C_1 = \frac{\beta_0(12) - \alpha_0(12)\lambda_2}{\lambda_1 - \lambda_2}, \quad (\text{S1.1a})$$

$$C_2 = -\frac{\beta_0(12) - \alpha_0(12)\lambda_1}{\lambda_1 - \lambda_2}. \quad (\text{S1.1b})$$

The coefficients  $C_3$  and  $C_4$  in equation (14b) are determined by the initial conditions  $\alpha_0(123) = C_3 + C_4$  and  $\alpha_1(123) = C_3\lambda_3 + C_4\lambda_4$ . According to equation (5a) it holds  $\alpha_1(123) = s\alpha_0(123) + (1 - 2s)\beta_0(123)$ , and thus we have

$$C_3 = \frac{(1 - 2s)\beta_0(123) + (s - \lambda_4)\alpha_0(123)}{\lambda_3 - \lambda_4}, \quad (\text{S1.2a})$$

$$C_4 = \alpha_0(123) - C_3 \quad (\text{S1.2b})$$

where we set  $C_3 = \alpha_0(123)$  and  $C_4 = 0$  for the case of  $\lambda_3 = \lambda_4$ .

According to the recurrence equations (10a, 10b), we have

$$J_t(1122) = (1 - s)J_{t-1}(1122) + \frac{s}{2}J_{t-2}(1122) + \frac{s}{2}R_{t-2}. \quad (\text{S1.3})$$

Substituting the equations (14c, 14d) into the above recurrence relation and noting that  $\lambda_{1,2}^2 - (1 - s)\lambda_{1,2} - s/2 = 0$ , we have

$$C_6 = -\frac{C_1}{1 + s - 2\lambda_1 s}, \quad (\text{S1.4})$$

$$C_8 = -\frac{C_2}{1 + s - 2\lambda_2 s}. \quad (\text{S1.5})$$

Let  $C_0 = [R_0 + C_1/(1 - \lambda_1) + C_2/(1 - \lambda_2)]$ , from the initial condition  $J_0(1122) = C_0 + C_5 + C_7$ ,  $J_1(1122) = K_0(1122) = C_0 + (C_5 + C_6)\lambda_1 + (C_7 + C_8)\lambda_2$ , the expressions for  $C_5$  and  $C_7$

are given by

$$C_5 = \frac{K_0(1122) - C_0 - C_6\lambda_1 - C_8\lambda_2 - \lambda_2 [J_0(1122) - C_0]}{\lambda_1 - \lambda_2}, \quad (\text{S1.6})$$

$$C_7 = J_0(1122) - C_5 - C_0. \quad (\text{S1.7})$$

We can obtain expressions for  $C_9, \dots, C_{12}$  similarly. According to the recurrence equations (8a, 8b), we have

$$J_t(1232) = (1 - s)J_{t-1}(1232) + \frac{s}{2}J_{t-2}(1213) + \alpha_{t-1}(123). \quad (\text{S1.8})$$

Substituting the equations (14b, 14e) into the above recurrence relation, we have

$$C_{11} = \frac{C_3\lambda_3}{\lambda_3^2 - (1 - s)\lambda_3 - s/2}, \quad (\text{S1.9})$$

$$C_{12} = \frac{C_4\lambda_4}{\lambda_4^2 - (1 - s)\lambda_4 - s/2}. \quad (\text{S1.10})$$

From the initial conditions  $J_0(1232) = C_9 + C_{10} + C_{11} + C_{12}$  and  $J_1(1232) = K_0(1232) + \alpha_0(123) = C_9\lambda_1 + C_{10}\lambda_2 + C_{11}\lambda_3 + C_{12}\lambda_4$ , we have

$$C_9 = \frac{K_0(1232) + \alpha_0(123) - C_{11}\lambda_3 - C_{12}\lambda_4 - \lambda_2 [J_0(1232) - C_{11} - C_{12}]}{\lambda_1 - \lambda_2} \quad (\text{S1.11})$$

$$C_{10} = J_0(1232) - C_9 - C_{11} - C_{12}. \quad (\text{S1.12})$$
