# Supplementary material
Source: PubMed Central journal article supplement (PMC4174956)
Supplement: 33d7102f6d77365d167adc712feb8933_genetics.114.163006-2.pdf [file 33d7102f6d77365d167adc712feb8933_genetics.114.163006-2.pdf]

**Table S1 List of symbols and their brief explanations.**

| Category           | Symbol                                                                                                             | Explanation                                                                                                                                                                 |
|--------------------|--------------------------------------------------------------------------------------------------------------------|-----------------------------------------------------------------------------------------------------------------------------------------------------------------------------|
| Two-gene           | $(ab)$                                                                                                             | Two-gene IBD configurations include (11) and (12)                                                                                                                           |
|                    | $\alpha_t(ab)$                                                                                                     | Within-individual probability of configuration $(ab)$ in generation $t$                                                                                                     |
|                    | $\beta_t(ab)$                                                                                                      | Between-individual probability of configuration $(ab)$ in generation $t$                                                                                                    |
|                    | $\alpha_t(11)$                                                                                                     | Within-individual two-gene IBD probability in generation $t$                                                                                                                |
|                    | $\alpha_t(12)$                                                                                                     | Within-individual two-gene non-IBD probability in generation $t$                                                                                                            |
|                    | $s_t$                                                                                                              | Two-gene coalescence probability that both come from a single individual of the previous generation $t - 1$                                                                 |
| Three-gene         | $(abc)$                                                                                                            | Three-gene IBD configurations include (111), (112), (121), (122), (123)                                                                                                     |
|                    | $\alpha_t(abc)$                                                                                                    | Probability of configuration $(abc)$ in generation $t$ , given that genes a and c are in a single individual and gene b in another                                          |
|                    | $\beta_t(abc)$                                                                                                     | Probability of configuration $(abc)$ in generation $t$ , given that the three genes are in three distinct individuals                                                       |
|                    | $\alpha_t(123)$                                                                                                    | Non-IBD probability of the three genes                                                                                                                                      |
|                    | $\alpha_t(122)$                                                                                                    | Probability that the genes a and b are non-IBD and genes b and c are IBD                                                                                                    |
|                    | $\alpha_t(1_2)$                                                                                                    | Marginal non-IBD probability between genes a and c                                                                                                                          |
|                    | $q_t$                                                                                                              | Three-gene coalescence probability that one particular gene comes from one individual and other two genes come from another individual of the previous generation $t - 1$ . |
| Four-gene          | $(abcd)$                                                                                                           | Four-gene IBD configurations include the 15 configurations shown in Table 1                                                                                                 |
|                    | $D(abcd)$                                                                                                          | Two-locus probability of configuration $(abcd)$                                                                                                                             |
|                    | $J_t(abcd)$                                                                                                        | Within-individual expected junction density of type $(abcd)$ in generation $t$ . The seven junction types are shown in Table 1                                              |
|                    | $K_t(abcd)$                                                                                                        | Between-individual expected junction density of type $(abcd)$ in generation $t$                                                                                             |
| Breeding design    | $L$                                                                                                                | Number of distinct founder genome labels (FGL)                                                                                                                              |
|                    | $U$                                                                                                                | Number of intercross generations                                                                                                                                            |
|                    | $V$                                                                                                                | Number of inbreeding generations                                                                                                                                            |
|                    | $N_t$                                                                                                              | Population size in generation $t$                                                                                                                                           |
|                    | $N_F$                                                                                                              | Constant size of founder population, and $N_F=L$ if founders are fully inbred                                                                                               |
|                    | $N_I$                                                                                                              | Constant size of intercross populations                                                                                                                                     |
|                    | $N_{II}$                                                                                                           | Constant size of inbred populations. $N_{II} = 1$ if $\mathcal{M}_{II} = \text{Selfing}$ , and $N_{II} = 2$ if $\mathcal{M}_{II} = \text{Sibling}$                          |
|                    | $\mathcal{M}_t$                                                                                                    | Mating scheme from the generation $t$ to the next generation.                                                                                                               |
|                    | $\mathcal{M}_F$                                                                                                    | Constant mating scheme from the founder population to the $F_1$ population, $\mathcal{M}_F = \mathcal{M}_0$                                                                 |
|                    | $\mathcal{M}_I$                                                                                                    | Constant mating scheme in the intercross stage, $\mathcal{M}_I = \mathcal{M}_1 = \dots = \mathcal{M}_U$                                                                     |
| $\mathcal{M}_{II}$ | Constant mating scheme in the inbreeding stage, $\mathcal{M}_{II} = \mathcal{M}_{U+1} = \dots = \mathcal{M}_{U+V}$ |                                                                                                                                                                             |
| Map resolution     | $R$                                                                                                                | Map expansion, the expected junction density (per Morgan) on one chromosome                                                                                                 |
|                    | $\rho$                                                                                                             | Overall expected junction density, the expected junction density (per Morgan) on two homologous chromosomes                                                                 |
