# Supplementary material
Source: PubMed Central journal article supplement (PMC4174956)
Supplement: 7648731a220a95ded5a467f90fd85e0d_genetics.114.163006-1.pdf [file 7648731a220a95ded5a467f90fd85e0d_genetics.114.163006-1.pdf]

# File S1

## Supplementary Materials

### S1 Expressions of the constant coefficients

The coefficients  $C_1$  and  $C_2$  in equation (14a) are determined by the initial conditions  $\alpha_0(12) = C_1 + C_2$  and  $\alpha_1(12) = \beta_0(12) = C_1\lambda_1 + C_2\lambda_2$ . Thus we have

$$C_1 = \frac{\beta_0(12) - \alpha_0(12)\lambda_2}{\lambda_1 - \lambda_2}, \quad (\text{S1.1a})$$

$$C_2 = -\frac{\beta_0(12) - \alpha_0(12)\lambda_1}{\lambda_1 - \lambda_2}. \quad (\text{S1.1b})$$

The coefficients  $C_3$  and  $C_4$  in equation (14b) are determined by the initial conditions  $\alpha_0(123) = C_3 + C_4$  and  $\alpha_1(123) = C_3\lambda_3 + C_4\lambda_4$ . According to equation (5a) it holds  $\alpha_1(123) = s\alpha_0(123) + (1 - 2s)\beta_0(123)$ , and thus we have

$$C_3 = \frac{(1 - 2s)\beta_0(123) + (s - \lambda_4)\alpha_0(123)}{\lambda_3 - \lambda_4}, \quad (\text{S1.2a})$$

$$C_4 = \alpha_0(123) - C_3 \quad (\text{S1.2b})$$

where we set  $C_3 = \alpha_0(123)$  and  $C_4 = 0$  for the case of  $\lambda_3 = \lambda_4$ .

According to the recurrence equations (10a, 10b), we have

$$J_t(1122) = (1 - s)J_{t-1}(1122) + \frac{s}{2}J_{t-2}(1122) + \frac{s}{2}R_{t-2}. \quad (\text{S1.3})$$

Substituting the equations (14c, 14d) into the above recurrence relation and noting that  $\lambda_{1,2}^2 - (1 - s)\lambda_{1,2} - s/2 = 0$ , we have

$$C_6 = -\frac{C_1}{1 + s - 2\lambda_1 s}, \quad (\text{S1.4})$$

$$C_8 = -\frac{C_2}{1 + s - 2\lambda_2 s}. \quad (\text{S1.5})$$

Let  $C_0 = [R_0 + C_1/(1 - \lambda_1) + C_2/(1 - \lambda_2)]$ , from the initial condition  $J_0(1122) = C_0 + C_5 + C_7$ ,  $J_1(1122) = K_0(1122) = C_0 + (C_5 + C_6)\lambda_1 + (C_7 + C_8)\lambda_2$ , the expressions for  $C_5$  and  $C_7$

are given by

$$C_5 = \frac{K_0(1122) - C_0 - C_6\lambda_1 - C_8\lambda_2 - \lambda_2 [J_0(1122) - C_0]}{\lambda_1 - \lambda_2}, \quad (\text{S1.6})$$

$$C_7 = J_0(1122) - C_5 - C_0. \quad (\text{S1.7})$$

We can obtain expressions for  $C_9, \dots, C_{12}$  similarly. According to the recurrence equations (8a, 8b), we have

$$J_t(1232) = (1 - s)J_{t-1}(1232) + \frac{s}{2}J_{t-2}(1213) + \alpha_{t-1}(123). \quad (\text{S1.8})$$

Substituting the equations (14b, 14e) into the above recurrence relation, we have

$$C_{11} = \frac{C_3\lambda_3}{\lambda_3^2 - (1 - s)\lambda_3 - s/2}, \quad (\text{S1.9})$$

$$C_{12} = \frac{C_4\lambda_4}{\lambda_4^2 - (1 - s)\lambda_4 - s/2}. \quad (\text{S1.10})$$

From the initial conditions  $J_0(1232) = C_9 + C_{10} + C_{11} + C_{12}$  and  $J_1(1232) = K_0(1232) + \alpha_0(123) = C_9\lambda_1 + C_{10}\lambda_2 + C_{11}\lambda_3 + C_{12}\lambda_4$ , we have

$$C_9 = \frac{K_0(1232) + \alpha_0(123) - C_{11}\lambda_3 - C_{12}\lambda_4 - \lambda_2 [J_0(1232) - C_{11} - C_{12}]}{\lambda_1 - \lambda_2} \quad (\text{S1.11})$$

$$C_{10} = J_0(1232) - C_9 - C_{11} - C_{12}. \quad (\text{S1.12})$$

**Table S1 List of symbols and their brief explanations.**

| Category           | Symbol                                                                                                             | Explanation                                                                                                                                                                 |
|--------------------|--------------------------------------------------------------------------------------------------------------------|-----------------------------------------------------------------------------------------------------------------------------------------------------------------------------|
| Two-gene           | $(ab)$                                                                                                             | Two-gene IBD configurations include (11) and (12)                                                                                                                           |
|                    | $\alpha_t(ab)$                                                                                                     | Within-individual probability of configuration $(ab)$ in generation $t$                                                                                                     |
|                    | $\beta_t(ab)$                                                                                                      | Between-individual probability of configuration $(ab)$ in generation $t$                                                                                                    |
|                    | $\alpha_t(11)$                                                                                                     | Within-individual two-gene IBD probability in generation $t$                                                                                                                |
|                    | $\alpha_t(12)$                                                                                                     | Within-individual two-gene non-IBD probability in generation $t$                                                                                                            |
|                    | $s_t$                                                                                                              | Two-gene coalescence probability that both come from a single individual of the previous generation $t - 1$                                                                 |
| Three-gene         | $(abc)$                                                                                                            | Three-gene IBD configurations include (111), (112), (121), (122), (123)                                                                                                     |
|                    | $\alpha_t(abc)$                                                                                                    | Probability of configuration $(abc)$ in generation $t$ , given that genes a and c are in a single individual and gene b in another                                          |
|                    | $\beta_t(abc)$                                                                                                     | Probability of configuration $(abc)$ in generation $t$ , given that the three genes are in three distinct individuals                                                       |
|                    | $\alpha_t(123)$                                                                                                    | Non-IBD probability of the three genes                                                                                                                                      |
|                    | $\alpha_t(122)$                                                                                                    | Probability that the genes a and b are non-IBD and genes b and c are IBD                                                                                                    |
|                    | $\alpha_t(1_2)$                                                                                                    | Marginal non-IBD probability between genes a and c                                                                                                                          |
|                    | $q_t$                                                                                                              | Three-gene coalescence probability that one particular gene comes from one individual and other two genes come from another individual of the previous generation $t - 1$ . |
| Four-gene          | $(abcd)$                                                                                                           | Four-gene IBD configurations include the 15 configurations shown in Table 1                                                                                                 |
|                    | $D(abcd)$                                                                                                          | Two-locus probability of configuration $(abcd)$                                                                                                                             |
|                    | $J_t(abcd)$                                                                                                        | Within-individual expected junction density of type $(abcd)$ in generation $t$ . The seven junction types are shown in Table 1                                              |
|                    | $K_t(abcd)$                                                                                                        | Between-individual expected junction density of type $(abcd)$ in generation $t$                                                                                             |
| Breeding design    | $L$                                                                                                                | Number of distinct founder genome labels (FGL)                                                                                                                              |
|                    | $U$                                                                                                                | Number of intercross generations                                                                                                                                            |
|                    | $V$                                                                                                                | Number of inbreeding generations                                                                                                                                            |
|                    | $N_t$                                                                                                              | Population size in generation $t$                                                                                                                                           |
|                    | $N_F$                                                                                                              | Constant size of founder population, and $N_F=L$ if founders are fully inbred                                                                                               |
|                    | $N_I$                                                                                                              | Constant size of intercross populations                                                                                                                                     |
|                    | $N_{II}$                                                                                                           | Constant size of inbred populations. $N_{II} = 1$ if $\mathcal{M}_{II} = \text{Selfing}$ , and $N_{II} = 2$ if $\mathcal{M}_{II} = \text{Sibling}$                          |
|                    | $\mathcal{M}_t$                                                                                                    | Mating scheme from the generation $t$ to the next generation.                                                                                                               |
|                    | $\mathcal{M}_F$                                                                                                    | Constant mating scheme from the founder population to the $F_1$ population, $\mathcal{M}_F = \mathcal{M}_0$                                                                 |
|                    | $\mathcal{M}_I$                                                                                                    | Constant mating scheme in the intercross stage, $\mathcal{M}_I = \mathcal{M}_1 = \dots = \mathcal{M}_U$                                                                     |
| $\mathcal{M}_{II}$ | Constant mating scheme in the inbreeding stage, $\mathcal{M}_{II} = \mathcal{M}_{U+1} = \dots = \mathcal{M}_{U+V}$ |                                                                                                                                                                             |
| Map resolution     | $R$                                                                                                                | Map expansion, the expected junction density (per Morgan) on one chromosome                                                                                                 |
|                    | $\rho$                                                                                                             | Overall expected junction density, the expected junction density (per Morgan) on two homologous chromosomes                                                                 |

**Table S2** The three largest overall expected junction densities  $\rho$  for  $2^n$ -way RIL on autosomes at the last generation  $g = U + V + 1$ .

| Scheme         | $n$ | $U$ | $(\rho, V)$ |             |             |
|----------------|-----|-----|-------------|-------------|-------------|
| Selfing        | 1   | 0   | (2.5, 2)    | (2.5, 3)    | (2.375, 4)  |
|                | 2   | 1   | (3.75, 2)   | (3.625, 3)  | (3.5, 1)    |
|                | 3   | 2   | (5, 1)      | (5, 2)      | (4.75, 3)   |
|                | 4   | 3   | (6.5, 1)    | (6.25, 2)   | (6, 0)      |
|                | 5   | 4   | (8, 0)      | (8, 1)      | (7.5, 2)    |
|                | 6   | 5   | (10, 0)     | (9.5, 1)    | (8.75, 2)   |
| Sibling mating | 1   | 0   | (4.875, 8)  | (4.863, 9)  | (4.844, 7)  |
|                | 2   | 0   | (7.301, 8)  | (7.297, 7)  | (7.256, 9)  |
|                | 3   | 1   | (8.512, 7)  | (8.484, 6)  | (8.475, 8)  |
|                | 4   | 2   | (9.75, 6)   | (9.727, 7)  | (9.688, 5)  |
|                | 5   | 3   | (11.016, 5) | (11.016, 6) | (10.941, 7) |
|                | 6   | 4   | (12.344, 5) | (12.312, 4) | (12.281, 6) |
